# Supplementary material for: Overcoming TRAIL-resistance by sensitizing prostate cancer 3D spheroids with taxanes
Source: PubMed Central journal article supplement (PMC7932526; doi:10.1371/journal.pone.0246733), 2021-03-04

**DU145 Cells**

- 1 - Untreated 2D
- 2 - Untreated 3D
- 3 - 0.25 $\mu$ M CBZ 2D
- 4 - 0.25 $\mu$ M CBZ 3D
- 5 - 0.25 $\mu$ M DTX 2D
- 6 - 0.25 $\mu$ M DTX 3D

**PC3 Cells**

- 7 - Untreated 2D
- 8 - Untreated 3D
- 9 - 0.25 $\mu$ M CBZ 2D
- 10 - 0.25 $\mu$ M CBZ 3D
- 11 - 0.25 $\mu$ M DTX 2D
- 12 - 0.25 $\mu$ M DTX 3D

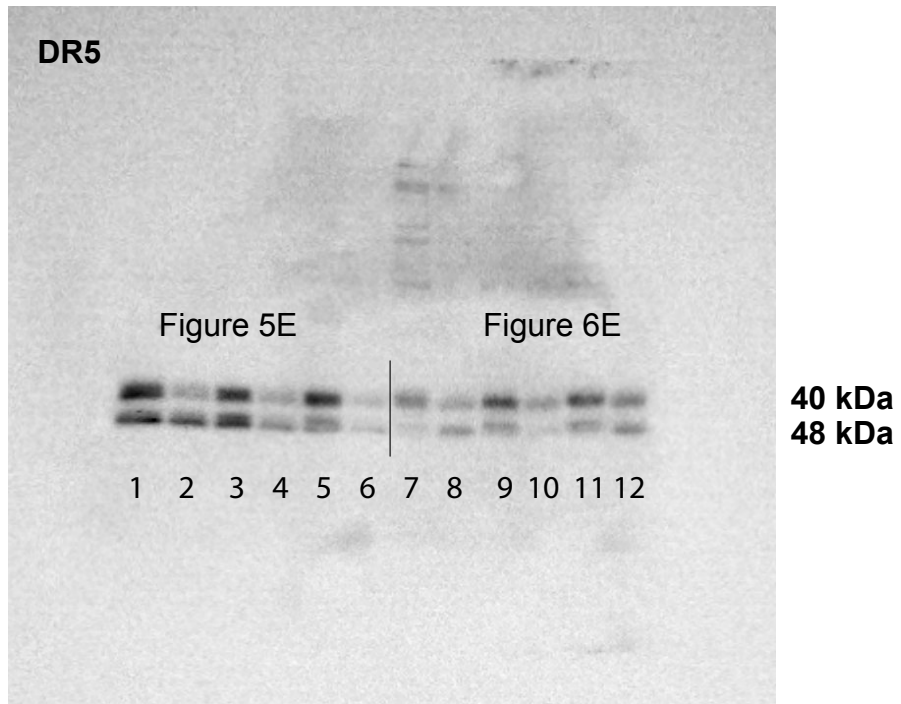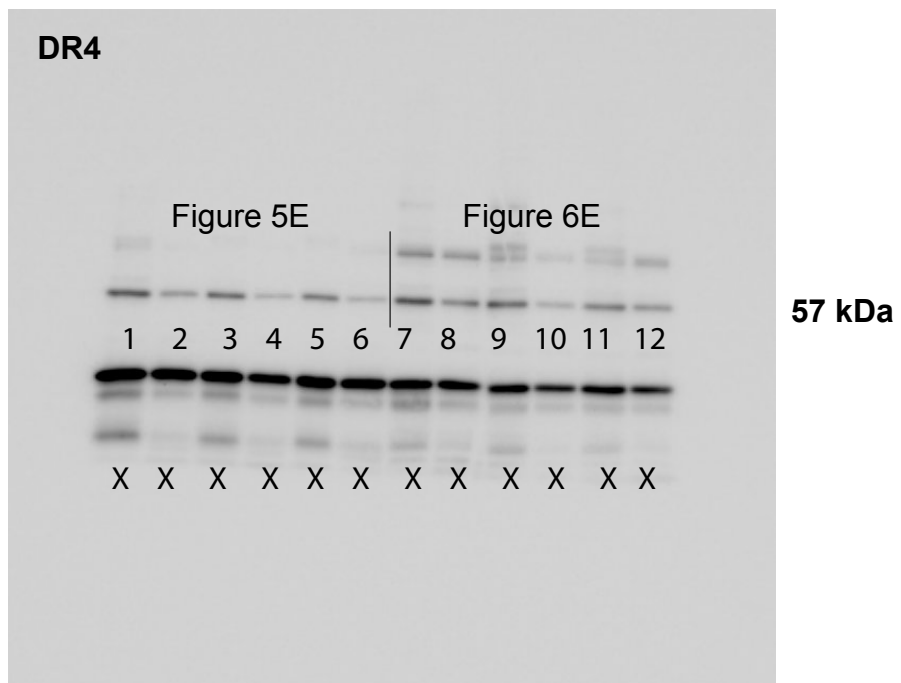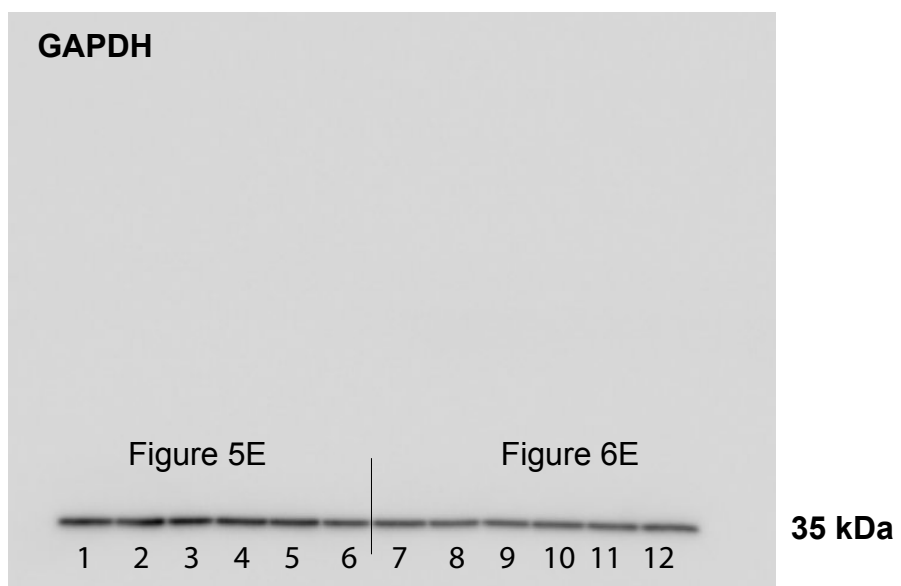

Supplement: pone.0246733.s001.pdf [file pone.0246733.s001.pdf]
