# Supplementary material for: Overcoming TRAIL-resistance by sensitizing prostate cancer 3D spheroids with taxanes
Source: PubMed Central journal article supplement (PMC7932526; doi:10.1371/journal.pone.0246733), 2021-03-04
Supplement: pone.0246733.s002.pdf [file pone.0246733.s002.pdf]

# Mycoplasma Test Results via Universal Mycoplasma Detection Kit (ATCC 30-1012K)

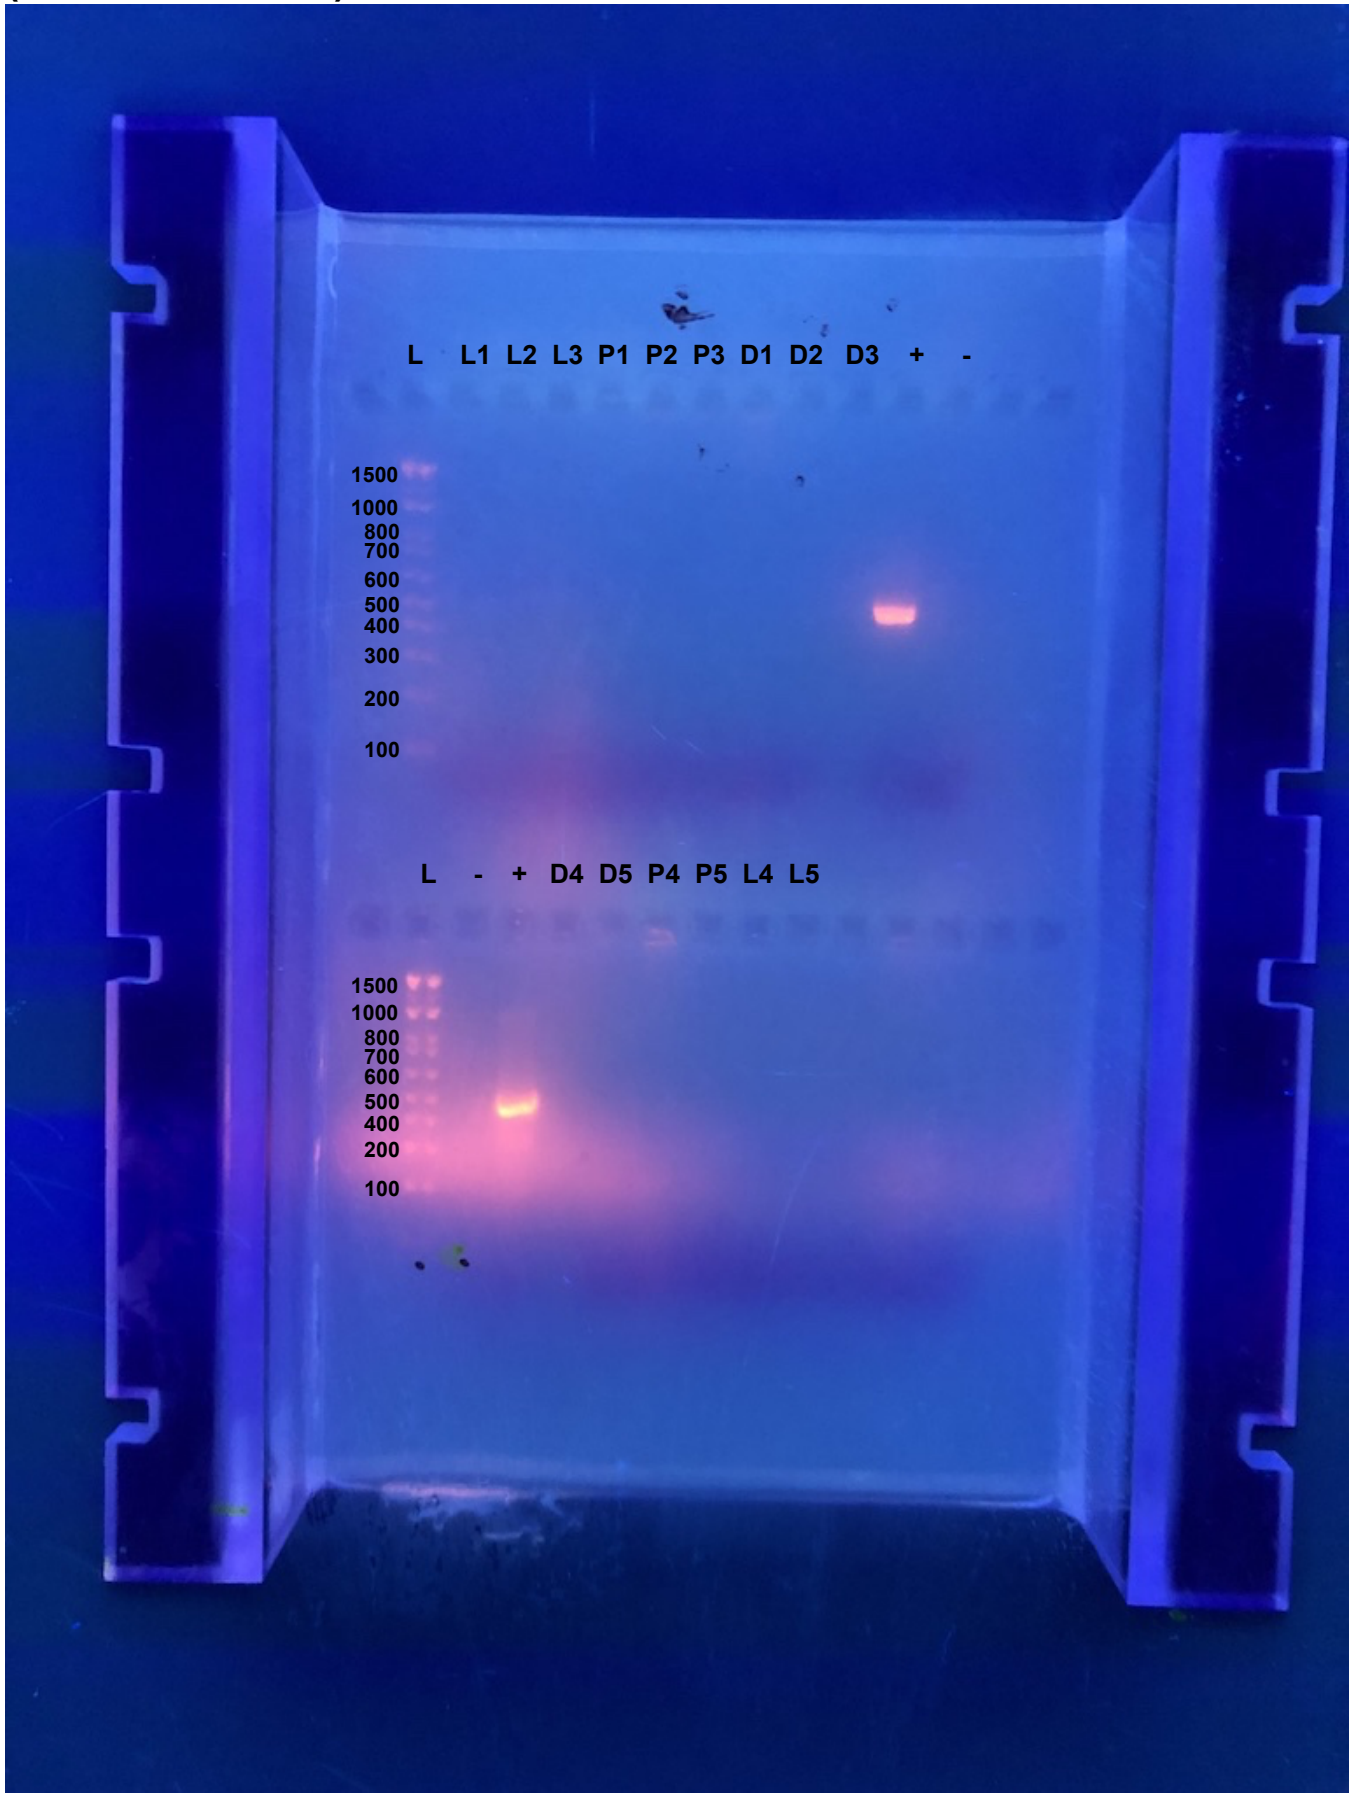

**L: Ladder      (-): Negative Control      (+): Positive Control**

**L1 - LNCaP Passage 2  
L2 - LNCaP Passage 2  
L3 - LNCaP Passage 2  
L4 - LNCaP Passage 8  
L5 - LNCaP Passage 8**

**P1 - PC3 Passage 3  
P2 - PC3 Passage 3  
P3 - PC3 Passage 3  
P4 - PC3 Passage 15  
P5 - PC3 Passage 15**

**D1 - DU145 Passage 3  
D2 - DU145 Passage 3  
D3 - DU145 Passage 3  
D4 - DU145 Passage 15  
D5 - DU145 Passage 15**
